# Supplementary material for: Benzylisoquinoline Alkaloids from the Stems of Limacia scandens and Their Potential as Autophagy Inhibitors
Source: MDPI journal article supplement (doi:10.3390/ph15111332), 2022-10-28
Supplement: s1 [file s1]

# Supplementary Materials

## **Benzylisoquinoline Alkaloids from the Stems of *Limacia scandens* and Their Potential as Autophagy Inhibitors**

Hee Ju Lee <sup>1,2</sup>, Eun Jin Park <sup>2</sup>, Byeol Ryu <sup>2</sup>, Hyo Moon Cho <sup>2</sup>, Duc-Trong Nghiem <sup>3</sup>, Ha-Thanh-Tung Pham <sup>4</sup>, Cheol-Ho Pan <sup>1</sup>, and Won Keun Oh <sup>2,\*</sup>

<sup>1</sup> Natural Product Informatics Research Center, Korea Institute of Science and Technology, Gangneung, 25451, Republic of Korea

<sup>2</sup> Korea Bioactive Natural Material Bank, Research Institute of Pharmaceutical Sciences, College of Pharmacy, Seoul National University, Seoul 08826, Republic of Korea

<sup>3</sup> Department of Botany, Hanoi University of Pharmacy, Hanoi 000084, Vietnam

<sup>4</sup> Faculty of Pharmacy, PHENIKAA University, Yen Nghia, Ha Dong, Hanoi 12116, Vietnam

\* Correspondence: [wkoh1@snu.ac.kr](mailto:wkoh1@snu.ac.kr) (W.K.O.)

## Table of Contents

|                                                                                                                                                                        |  |
|------------------------------------------------------------------------------------------------------------------------------------------------------------------------|--|
| Figure S1. <sup>1</sup> H NMR spectrum (CD <sub>3</sub> OD, 500 HMZ) of compound 1.                                                                                    |  |
| Figure S2. <sup>13</sup> C NMR spectrum (CD <sub>3</sub> OD, 200 HMZ) of compound 1.                                                                                   |  |
| Figure S3. HSQC spectrum (CD <sub>3</sub> OD, 500 HMZ) of compound 1.                                                                                                  |  |
| Figure S4. HMBC spectrum (CD <sub>3</sub> OD, 500 HMZ) of compound 1.                                                                                                  |  |
| Figure S5. <sup>1</sup> H- <sup>1</sup> H COSY spectrum (CD <sub>3</sub> OD, 500 HMZ) of compound 1.                                                                   |  |
| Figure S6. ROESY spectrum (CD <sub>3</sub> OD, 500 HMZ) of compound 1.                                                                                                 |  |
| Figure S7. HR-ESI-MS of compound 1.                                                                                                                                    |  |
| Figure S8. <sup>1</sup> H NMR spectrum (CD <sub>3</sub> OD, 500 HMZ) of compound 2.                                                                                    |  |
| Figure S9. <sup>13</sup> C NMR spectrum (CD <sub>3</sub> OD, 200 HMZ) of compound 2.                                                                                   |  |
| Figure S10. HSQC spectrum (CD <sub>3</sub> OD, 500 HMZ) of compound 2.                                                                                                 |  |
| Figure S11. HMBC spectrum (CD <sub>3</sub> OD, 500 HMZ) of compound 2.                                                                                                 |  |
| Figure S12. <sup>1</sup> H- <sup>1</sup> H COSY spectrum (CD <sub>3</sub> OD, 500 HMZ) of compound 2.                                                                  |  |
| Figure S13. ROESY spectrum (CD <sub>3</sub> OD, 500 HMZ) of compound 2.                                                                                                |  |
| Figure S14. HR-ESI-MS of compound 2.                                                                                                                                   |  |
| Figure S15. <sup>1</sup> H NMR spectrum (DMSO- <i>d</i> <sub>6</sub> , 800 MHz) of compound 3.                                                                         |  |
| Figure S16. <sup>13</sup> C NMR spectrum (DMSO- <i>d</i> <sub>6</sub> , 200 MHz) of compound 3.                                                                        |  |
| Figure S17. HSQC spectrum (DMSO- <i>d</i> <sub>6</sub> , 800 MHz) of compound 3.                                                                                       |  |
| Figure S18. HMBC spectrum (DMSO- <i>d</i> <sub>6</sub> , 800 MHz) of compound 3.                                                                                       |  |
| Figure S19. NOESY spectrum (DMSO- <i>d</i> <sub>6</sub> , 500 MHz) of compound 3.                                                                                      |  |
| Figure S20. HR-ESI-MS of compound 3.                                                                                                                                   |  |
| Figure S21. <sup>1</sup> H NMR spectrum (DMSO- <i>d</i> <sub>6</sub> , 500 MHz) of compound 4.                                                                         |  |
| Figure S22. <sup>13</sup> C NMR spectrum (DMSO- <i>d</i> <sub>6</sub> , 125 MHz) of compound 4.                                                                        |  |
| Figure S23. HSQC spectrum (DMSO- <i>d</i> <sub>6</sub> , 800 MHz) of compound 4.                                                                                       |  |
| Figure S24. HMBC spectrum (DMSO- <i>d</i> <sub>6</sub> , 800 MHz) of compound 4.                                                                                       |  |
| Figure S25. NOESY spectrum (DMSO- <i>d</i> <sub>6</sub> , 800 MHz) of compound 4.                                                                                      |  |
| Figure S26. HR-ESI-MS of compound 4.                                                                                                                                   |  |
| Figure S27. Experimental and calculated CD spectrum of compounds 3 and 4.                                                                                              |  |
| Figure S28. Cytotoxicity of compounds 1–10 on HEK293 cells. The compounds were treated at 20 μM for 24 h, the cytotoxicity was calculated compared with control group. |  |
| Figure S29. Morphological characteristics of <i>Limacia scandens</i> Lour. (A) The whole plant, (B) Abaxial leaf blade, (C) Inflorescences.                            |  |

Figure S30. Uncropped western blot images. (A) LC3B level, (B) p62 level, (C)  $\beta$ -actin level.

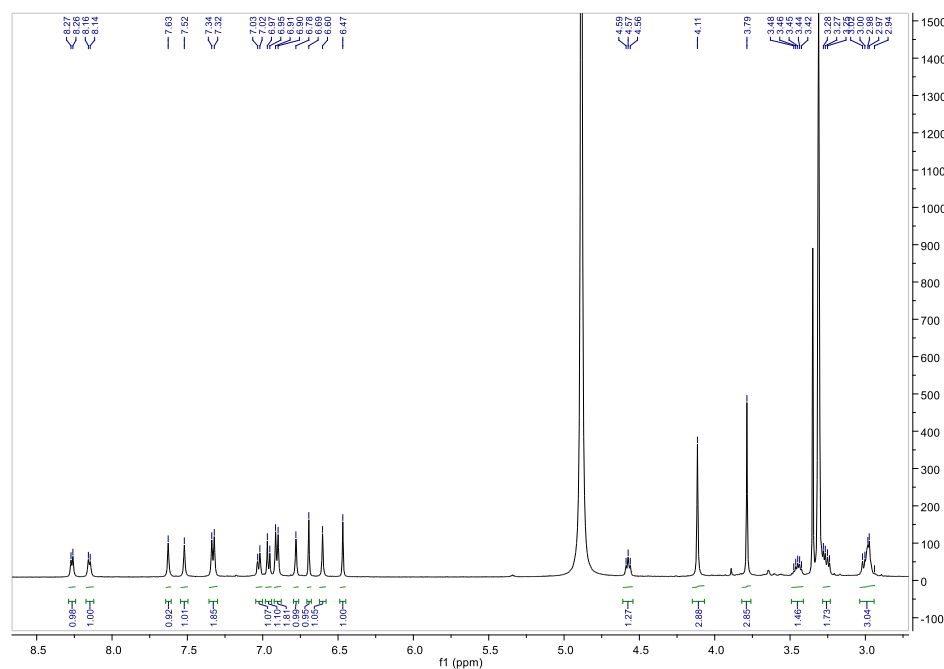

Figure S1. <sup>1</sup>H NMR spectrum (CD<sub>3</sub>OD, 500 MHz) of compound **1**.

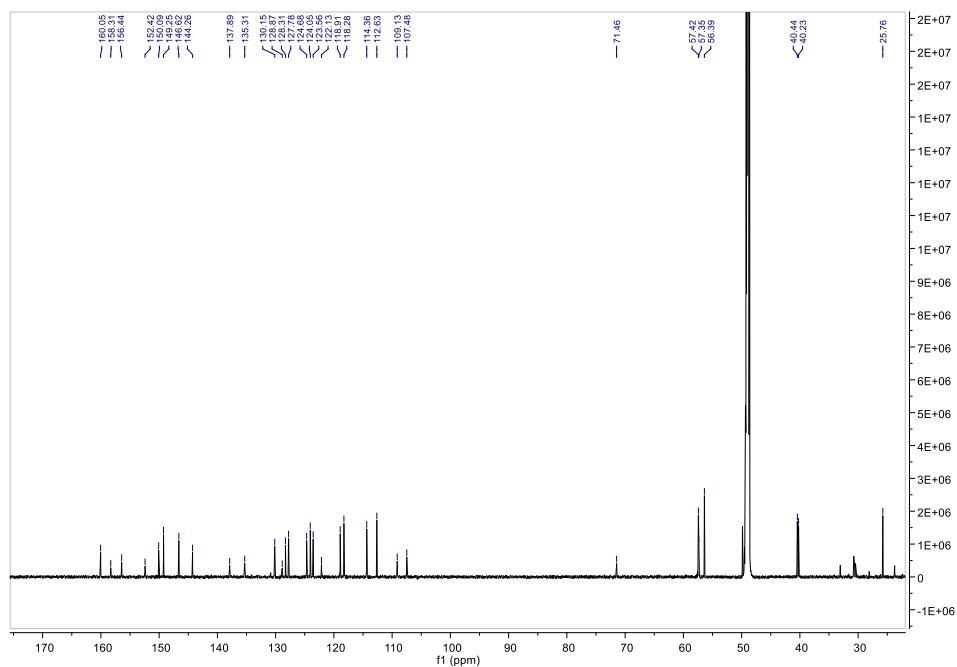

Figure S2. <sup>13</sup>C NMR spectrum (CD<sub>3</sub>OD, 200 MHz) of compound **1**.

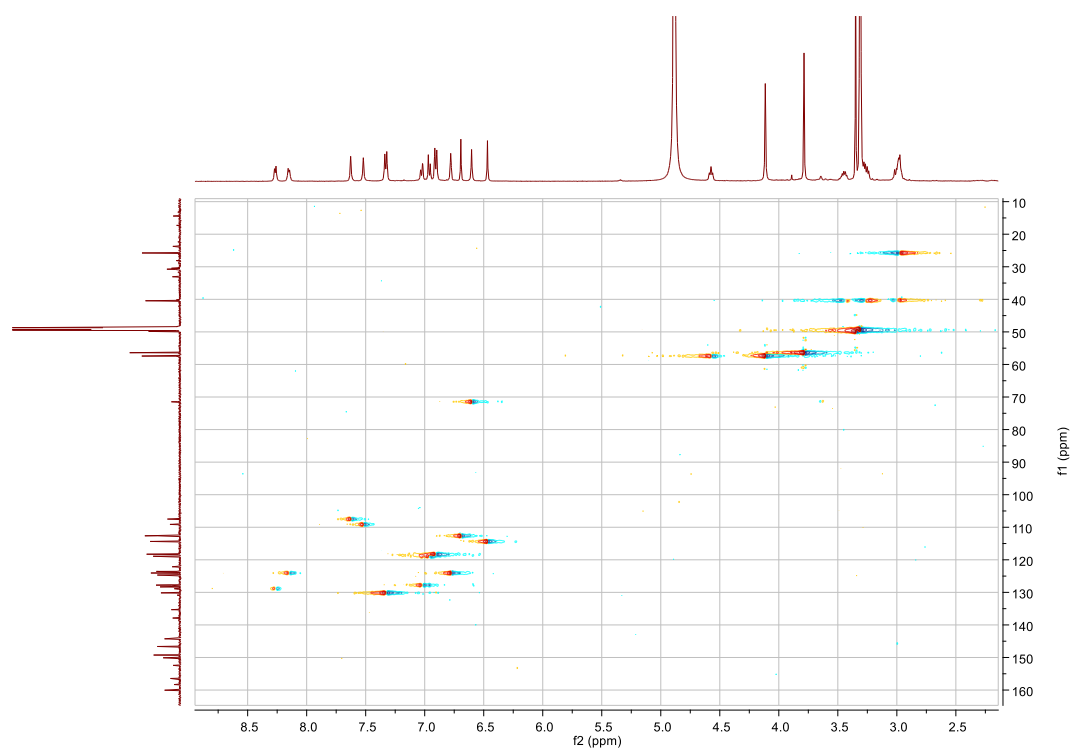

Figure S3. HSQC spectrum ( $\text{CD}_3\text{OD}$ , 500 MHz) of compound **1**.

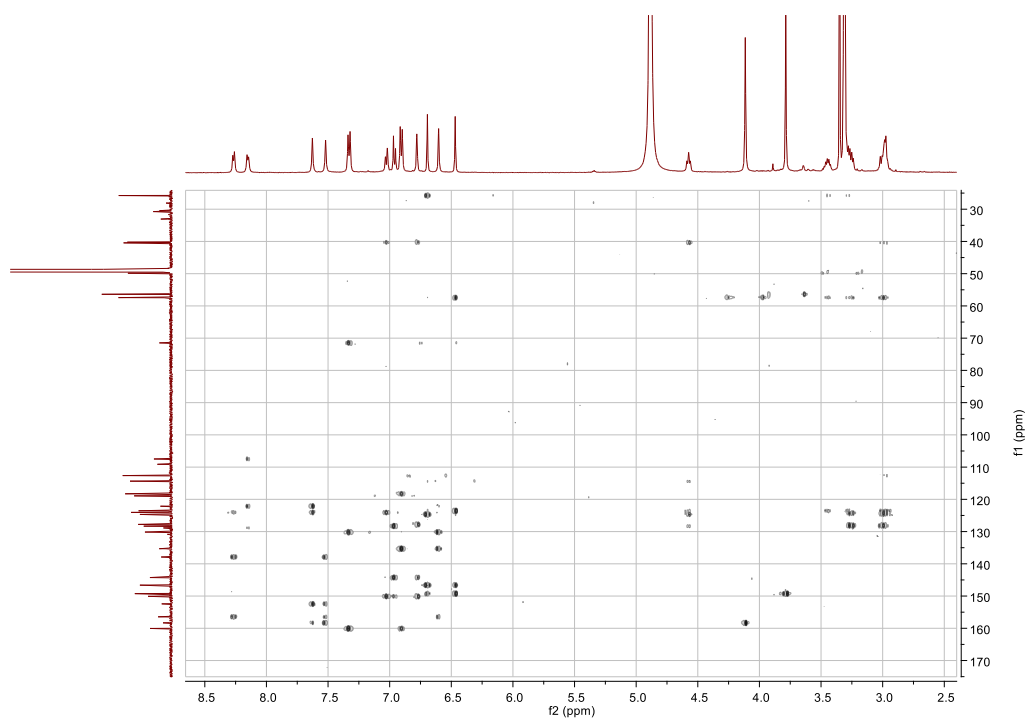

Figure S4. HMBC spectrum ( $\text{CD}_3\text{OD}$ , 500 MHz) of compound **1**.

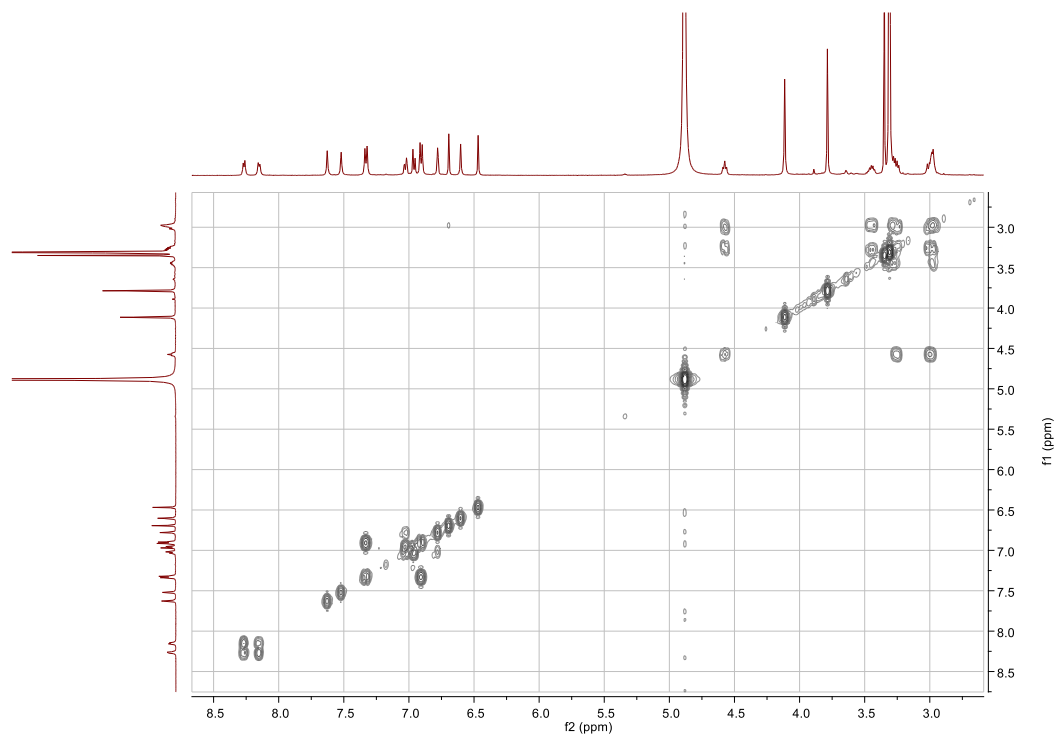

Figure S5.  $^1\text{H}$ - $^1\text{H}$  COSY spectrum ( $\text{CD}_3\text{OD}$ , 500 MHz) of compound **1**.

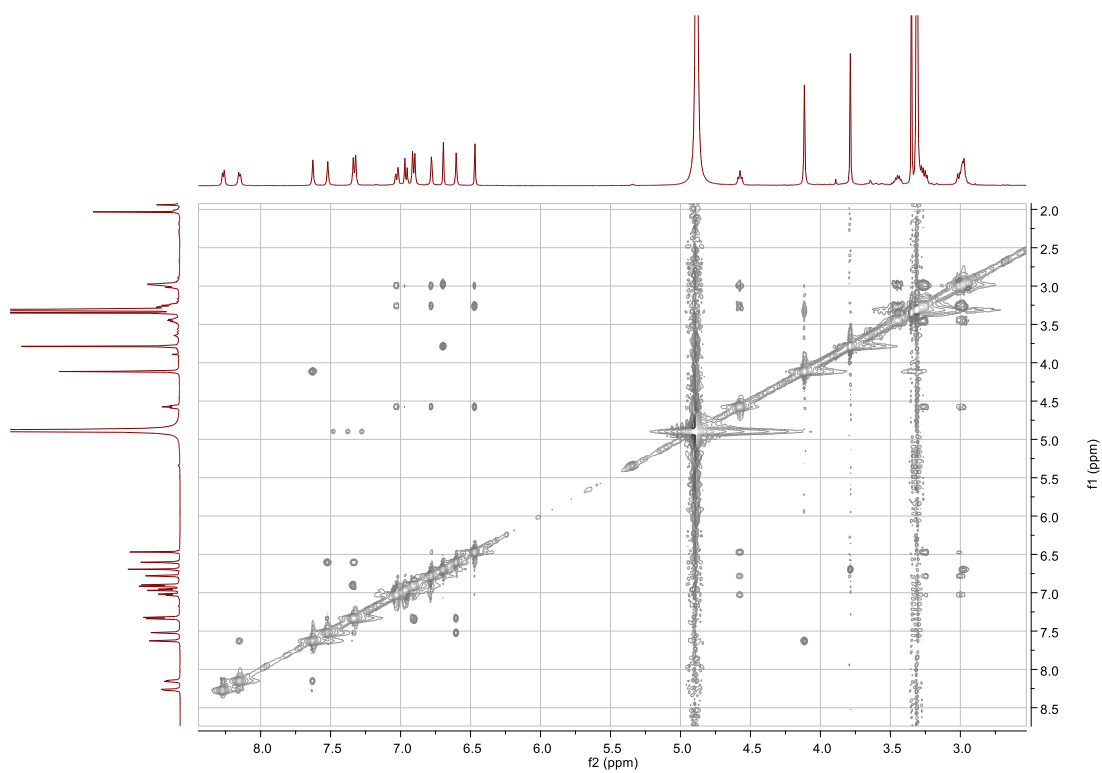

Figure S6. ROESY spectrum ( $\text{CD}_3\text{OD}$ , 500 MHz) of compound **1**.

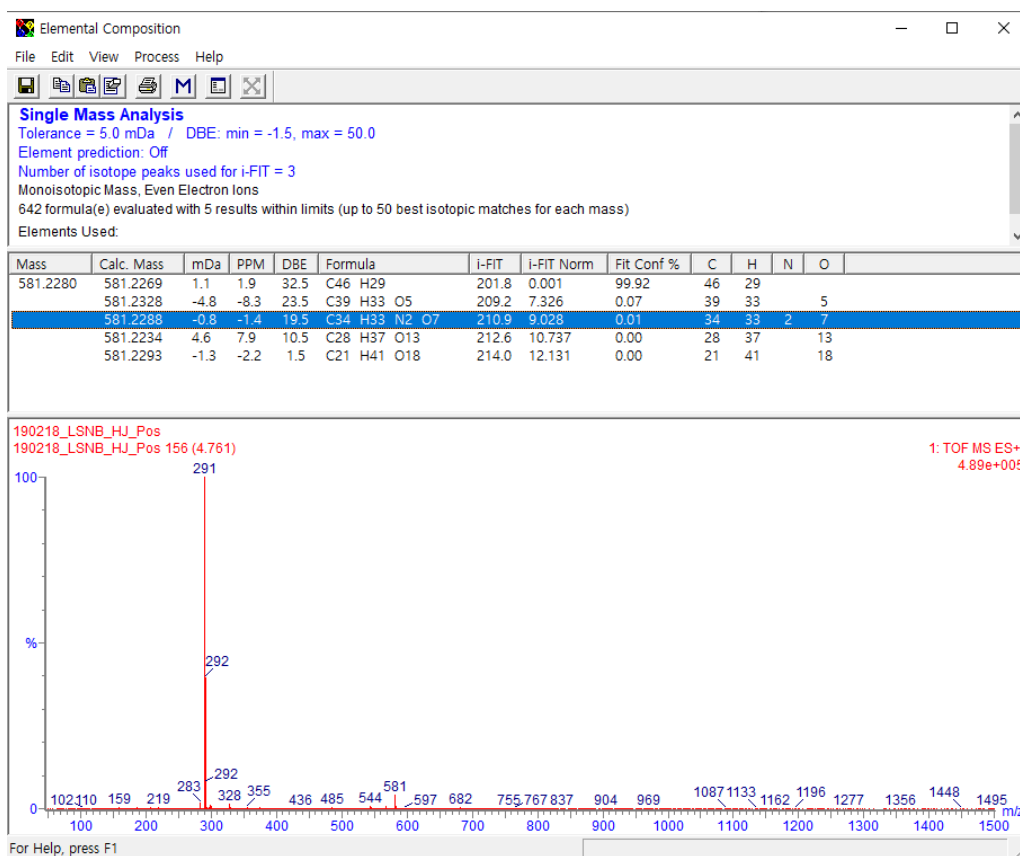

Figure S7. HR-ESI-MS of compound 1.

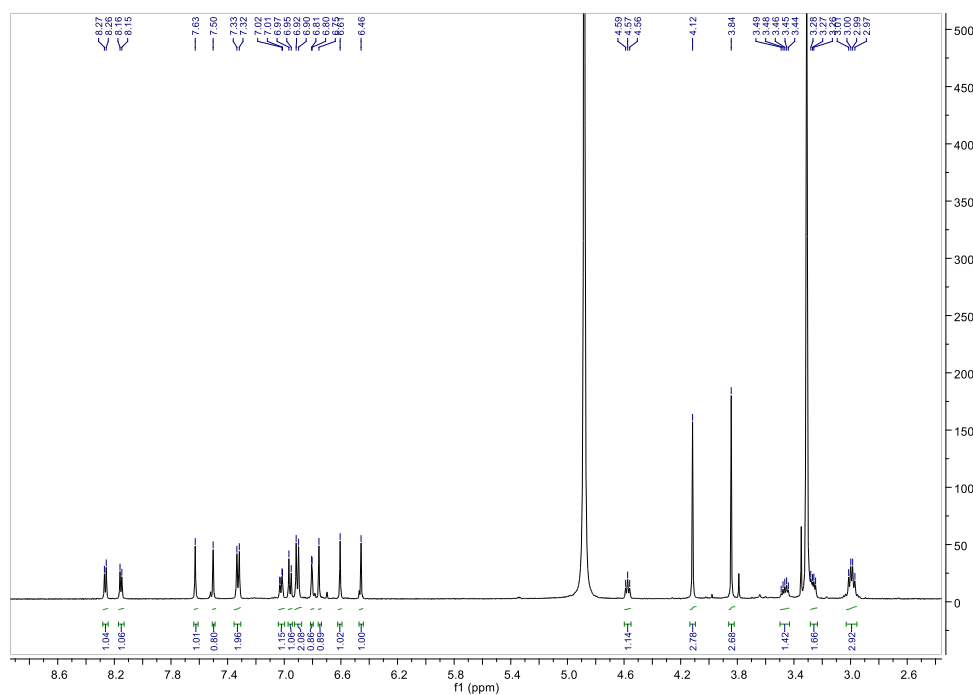

Figure S8.  $^1\text{H}$  NMR spectrum ( $\text{CD}_3\text{OD}$ , 500 MHz) of compound 2.

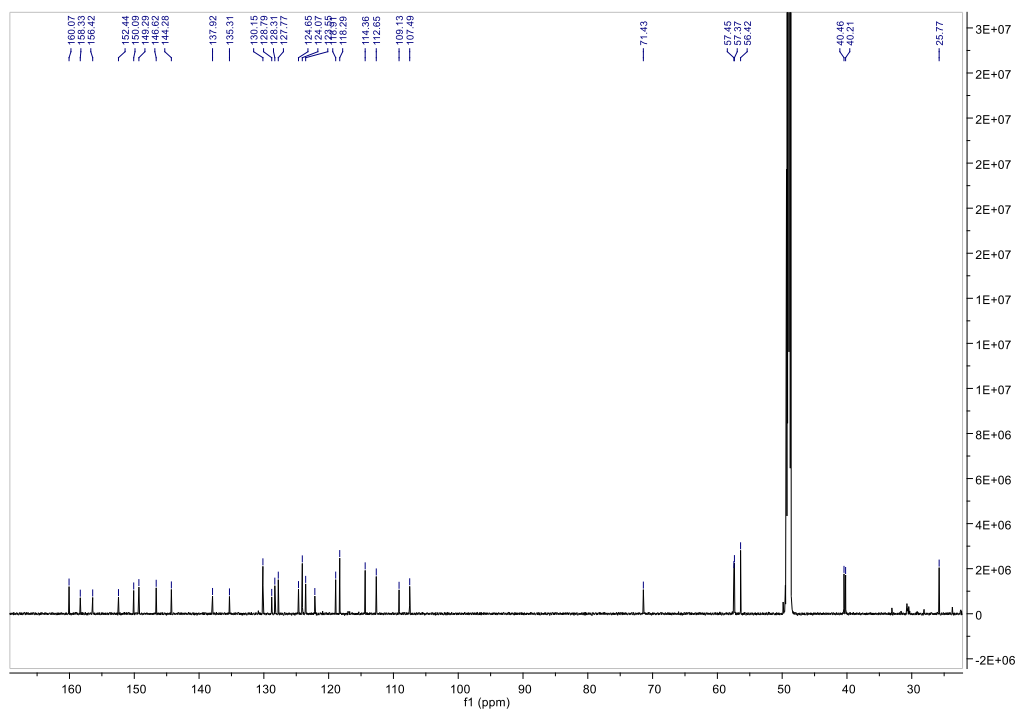

Figure S9.  $^{13}\text{C}$  NMR spectrum ( $\text{CD}_3\text{OD}$ , 200 MHz) of compound **2**.

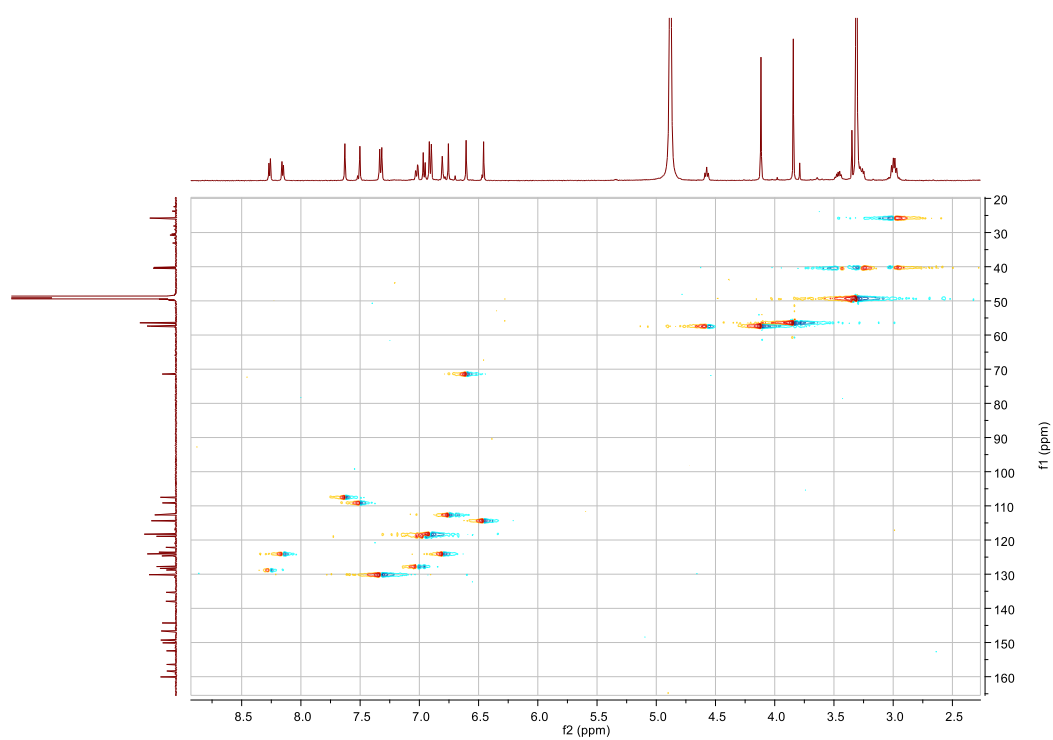

Figure S10. HSQC spectrum ( $\text{CD}_3\text{OD}$ , 500 MHz) of compound **2**.

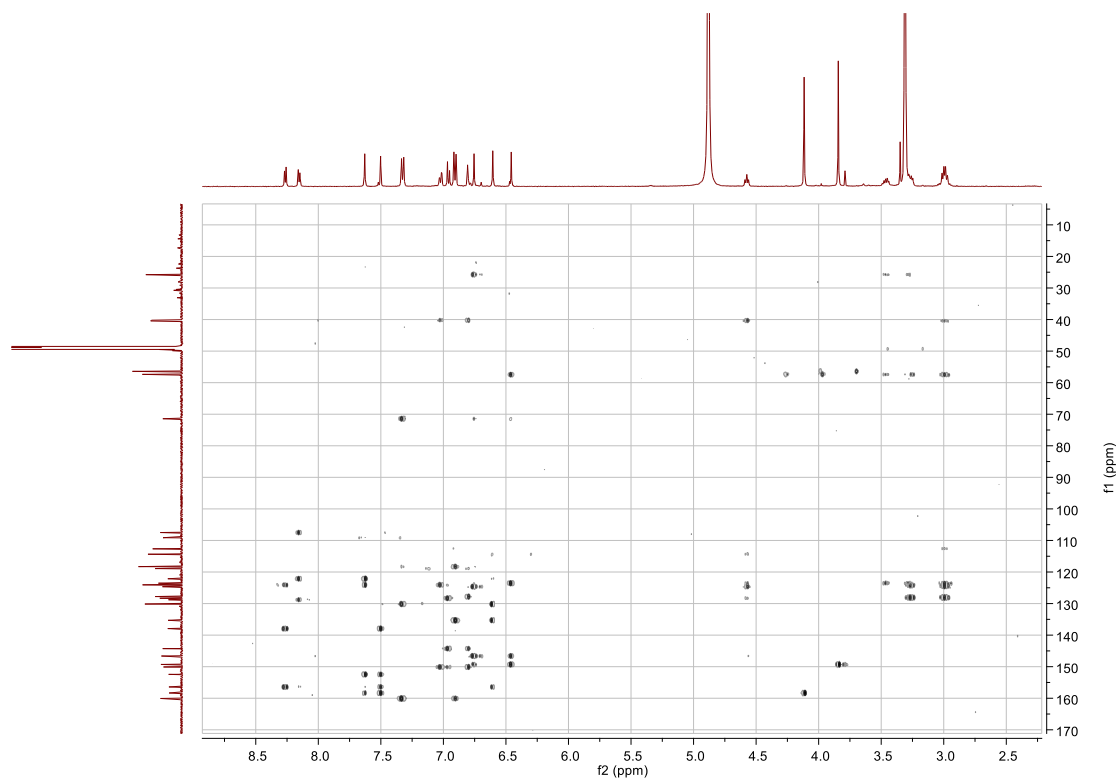

Figure S11. HMBC spectrum ( $\text{CD}_3\text{OD}$ , 500 MHz) of compound **2**.

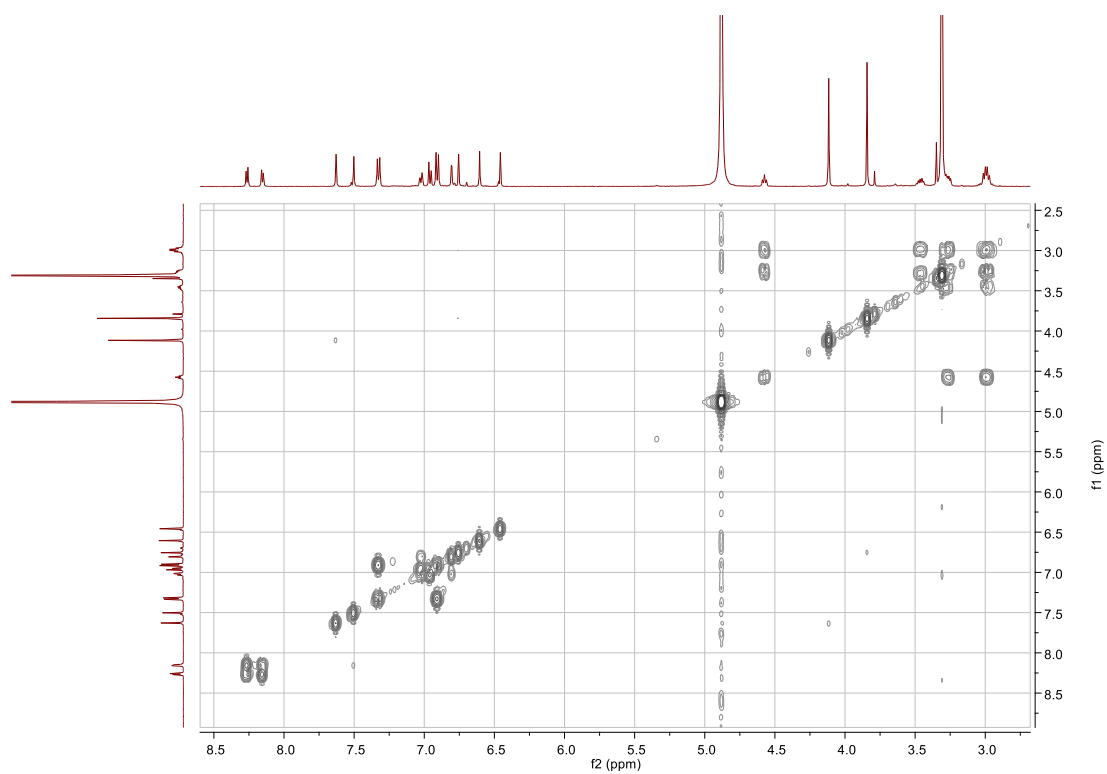

Figure S12.  $^1\text{H}$ - $^1\text{H}$  COSY spectrum ( $\text{CD}_3\text{OD}$ , 500 MHz) of compound **2**.



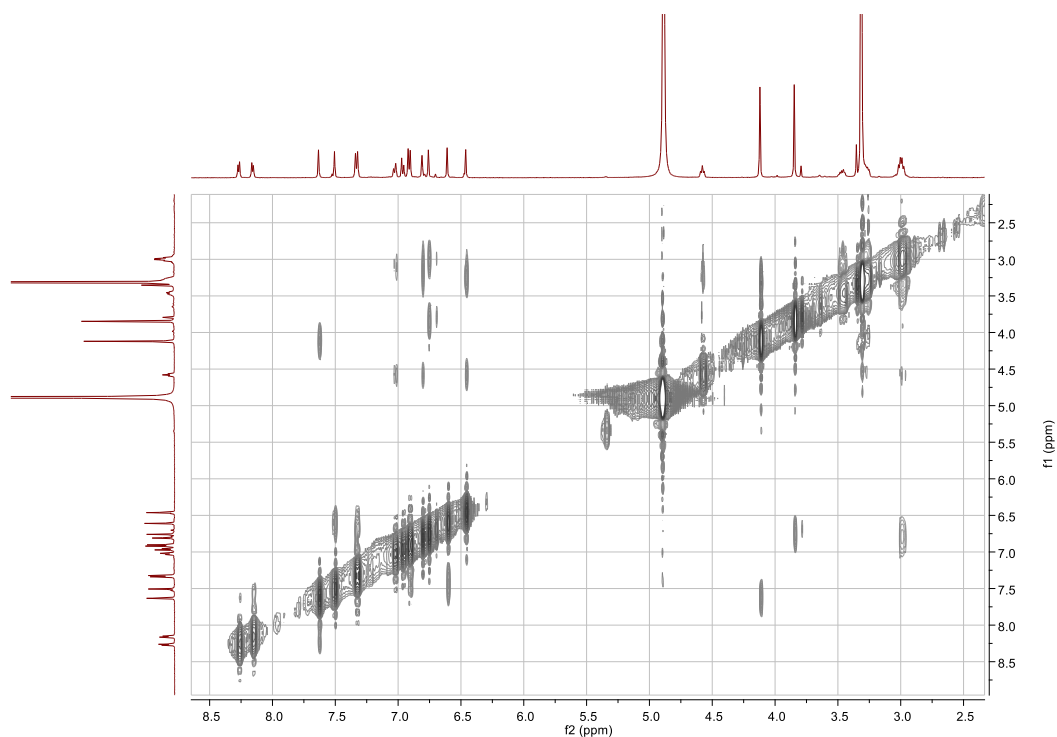

Figure S13. ROESY spectrum (CD<sub>3</sub>OD, 500 MHz) of compound **2**.

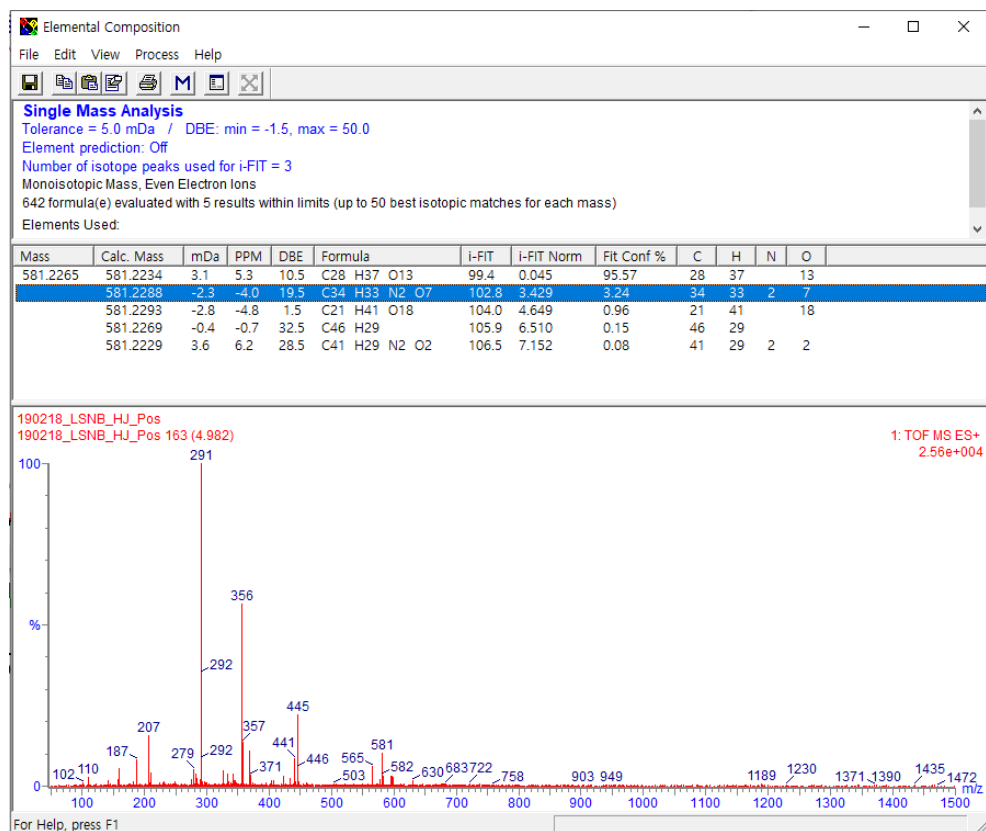

Figure S14. HR-ESI-MS of compound **2**.

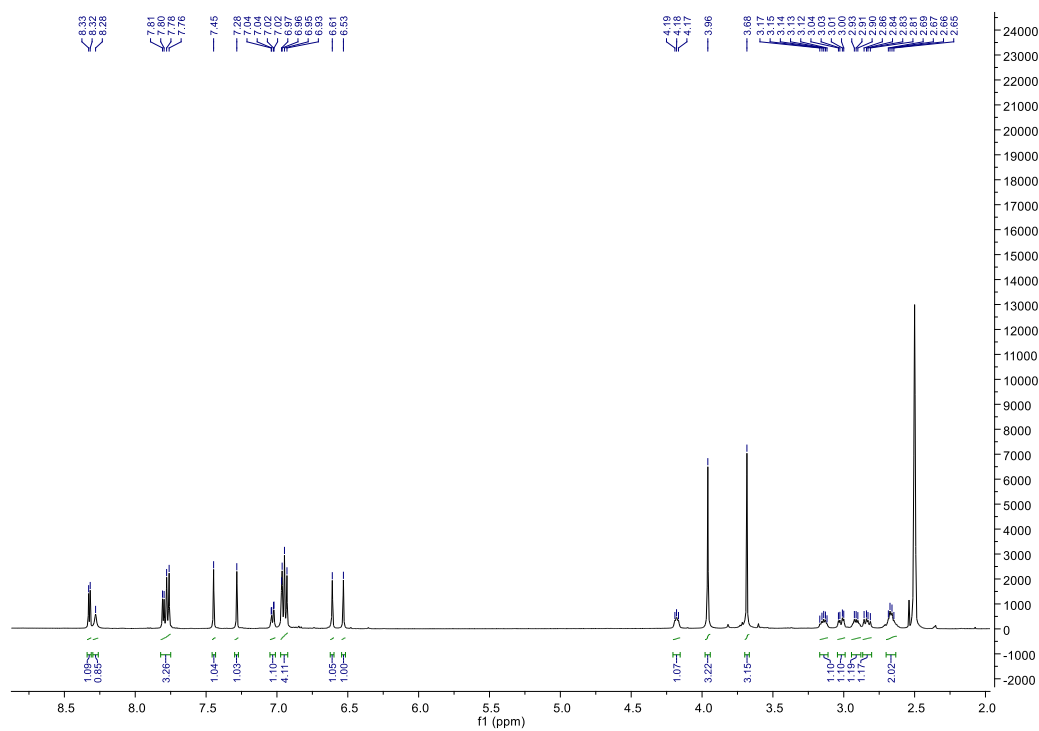

Figure S15. <sup>1</sup>H NMR spectrum (DMSO-*d*<sub>6</sub>, 800 MHz) of compound 3.

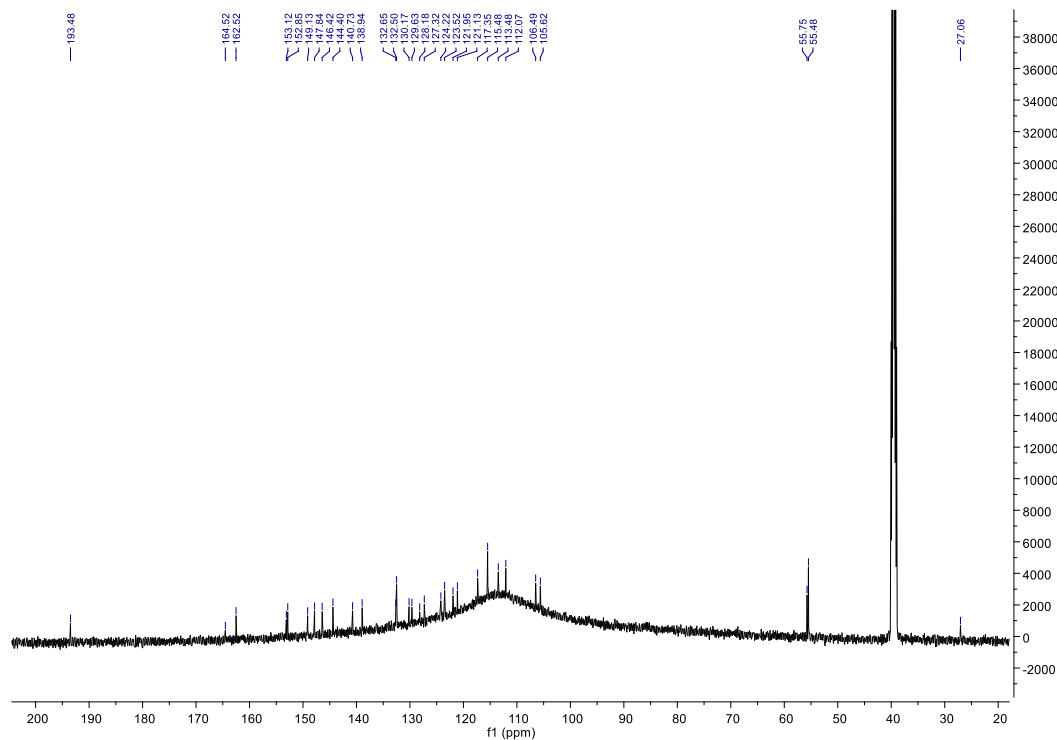

Figure S16. <sup>13</sup>C NMR spectrum (DMSO-*d*<sub>6</sub>, 200 MHz) of compound 3.

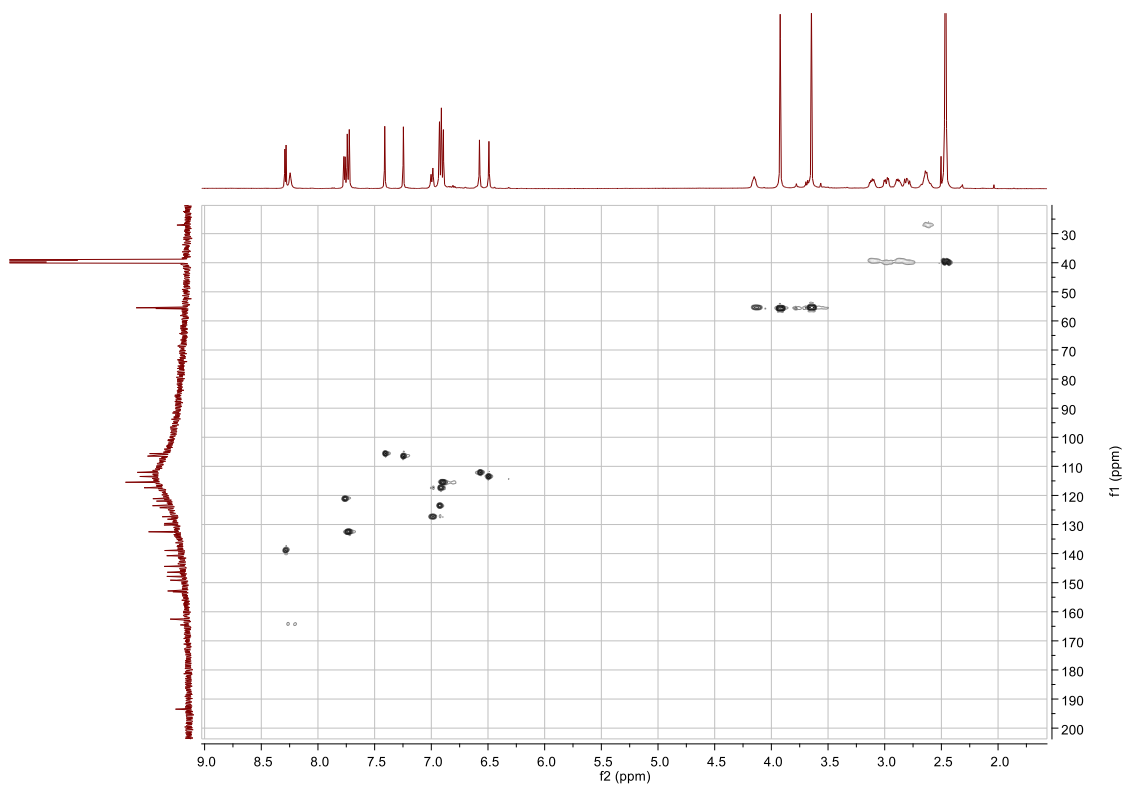

Figure S17. HSQC spectrum (DMSO- $d_6$ , 800 MHz) of compound **3**.

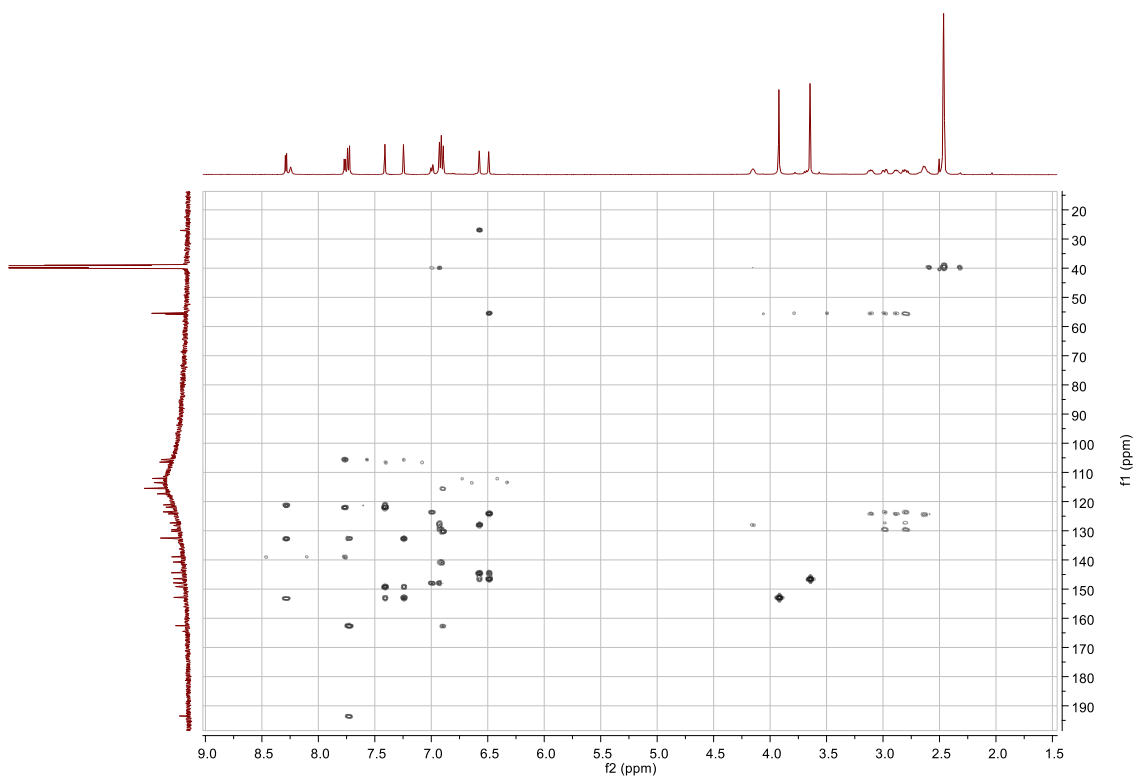

Figure S18. HMBC spectrum (DMSO- $d_6$ , 800 MHz) of compound **3**.

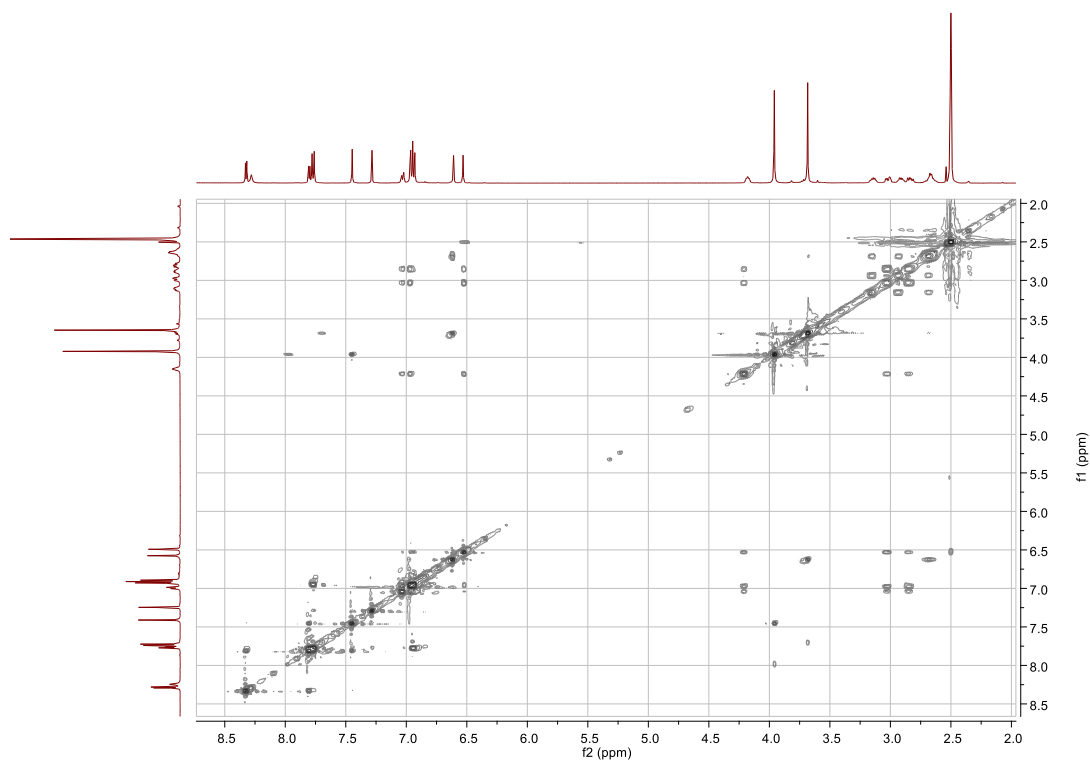

Figure S19. NOESY spectrum (DMSO-*d*<sub>6</sub>, 500 MHz) of compound **3**.

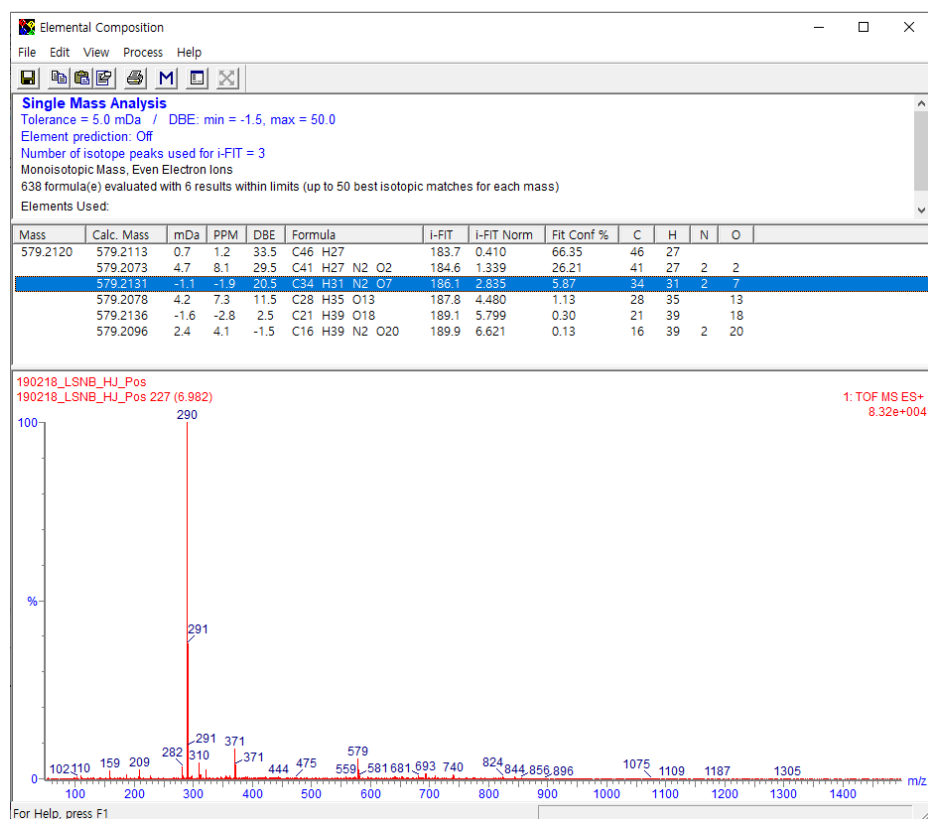

Figure S20. HR-ESI-MS of compound **3**.

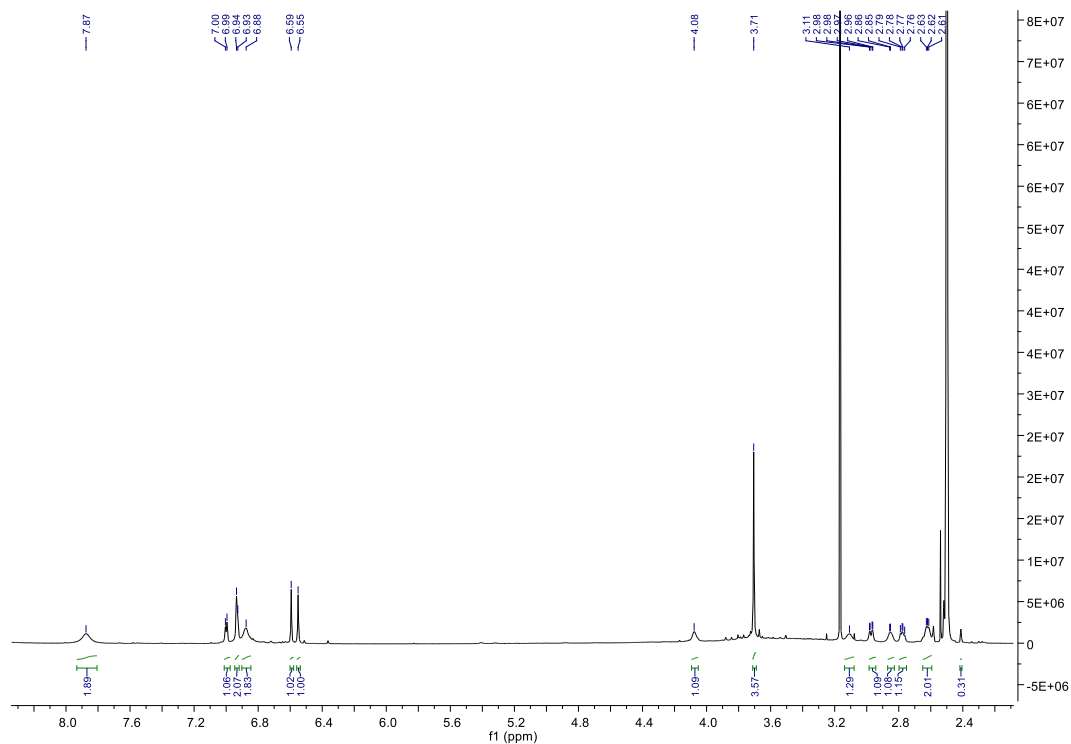

Figure S21. <sup>1</sup>H NMR spectrum (DMSO-*d*<sub>6</sub>, 500 MHz) of compound **4**.

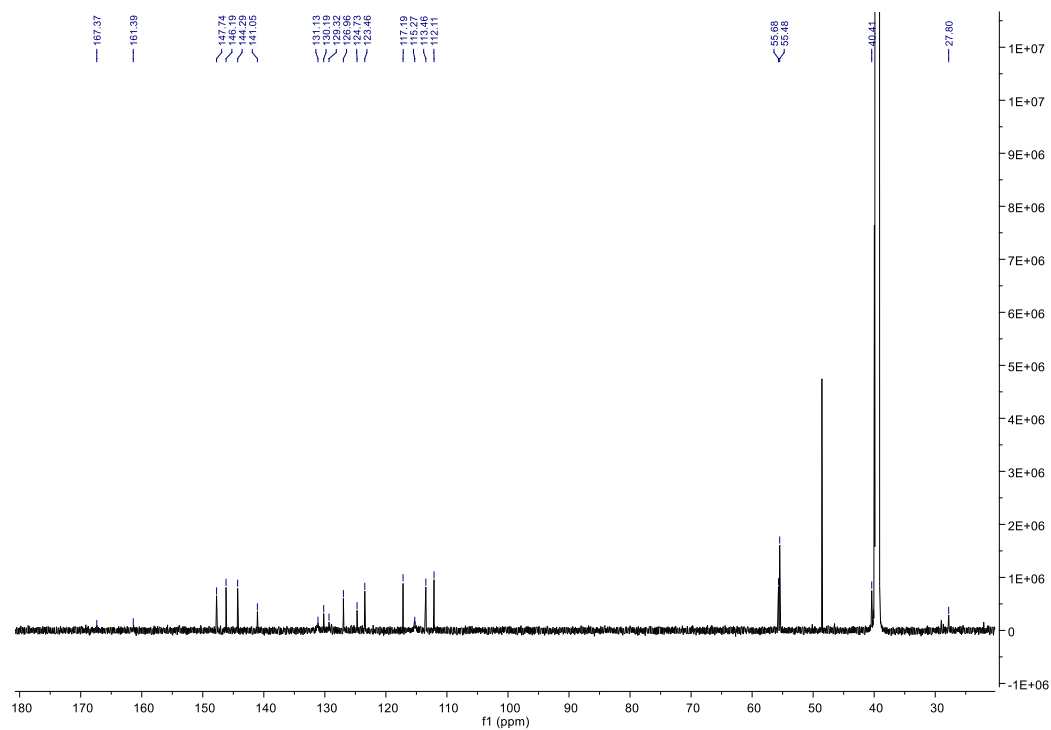

Figure S22. <sup>13</sup>C NMR spectrum (DMSO-*d*<sub>6</sub>, 125 MHz) of compound **4**.

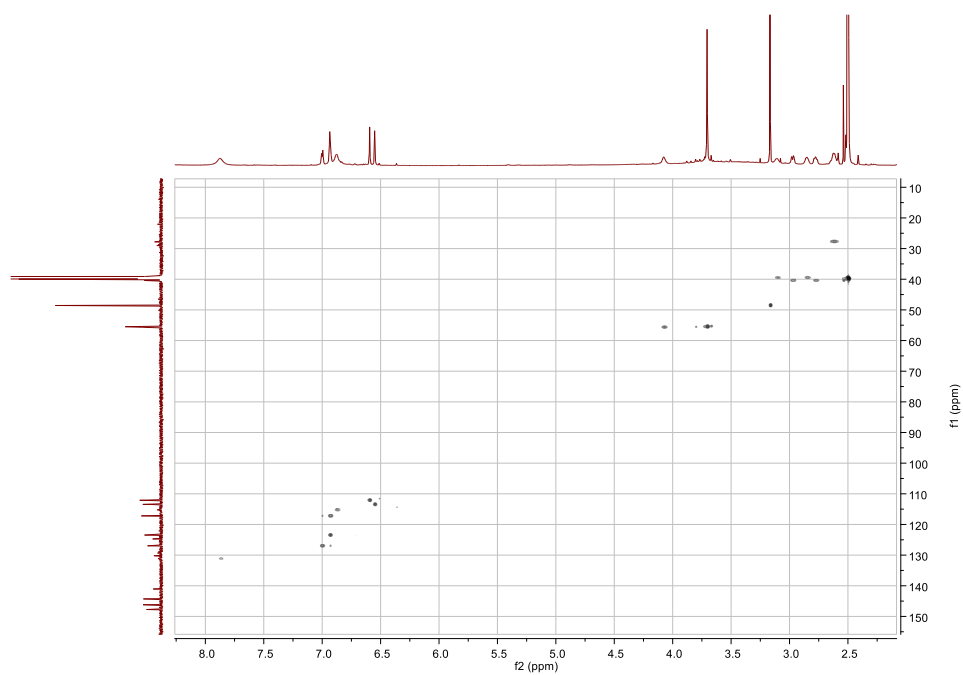

Figure S23. HSQC spectrum (DMSO- $d_6$ , 800 MHz) of compound **4**.

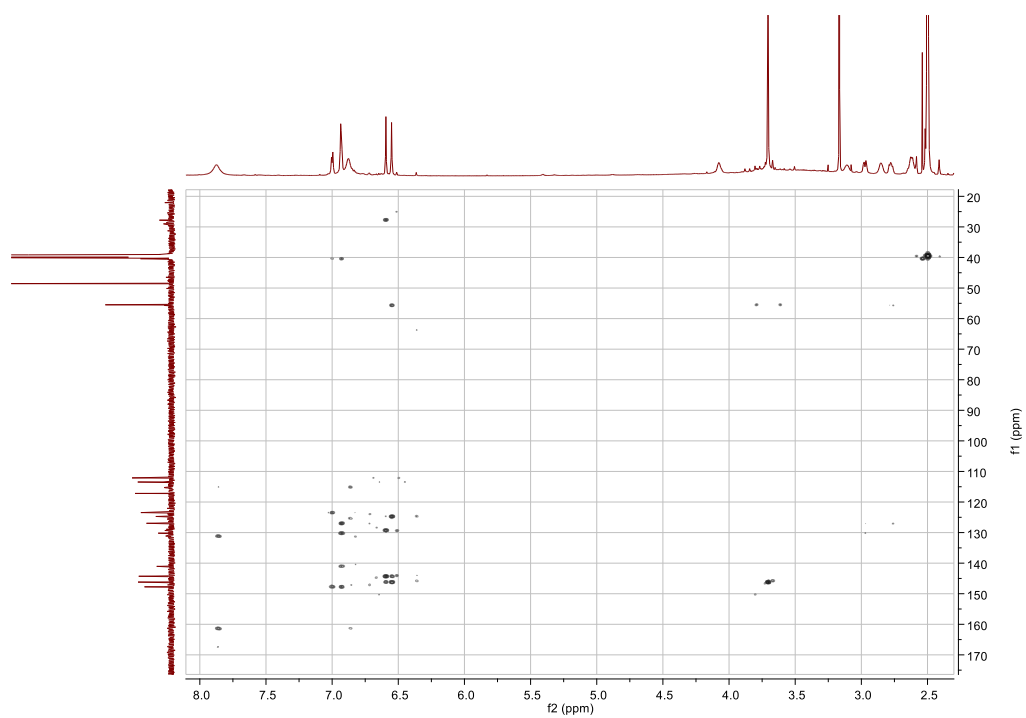

Figure S24. HMBC spectrum (DMSO- $d_6$ , 800 MHz) of compound **4**.

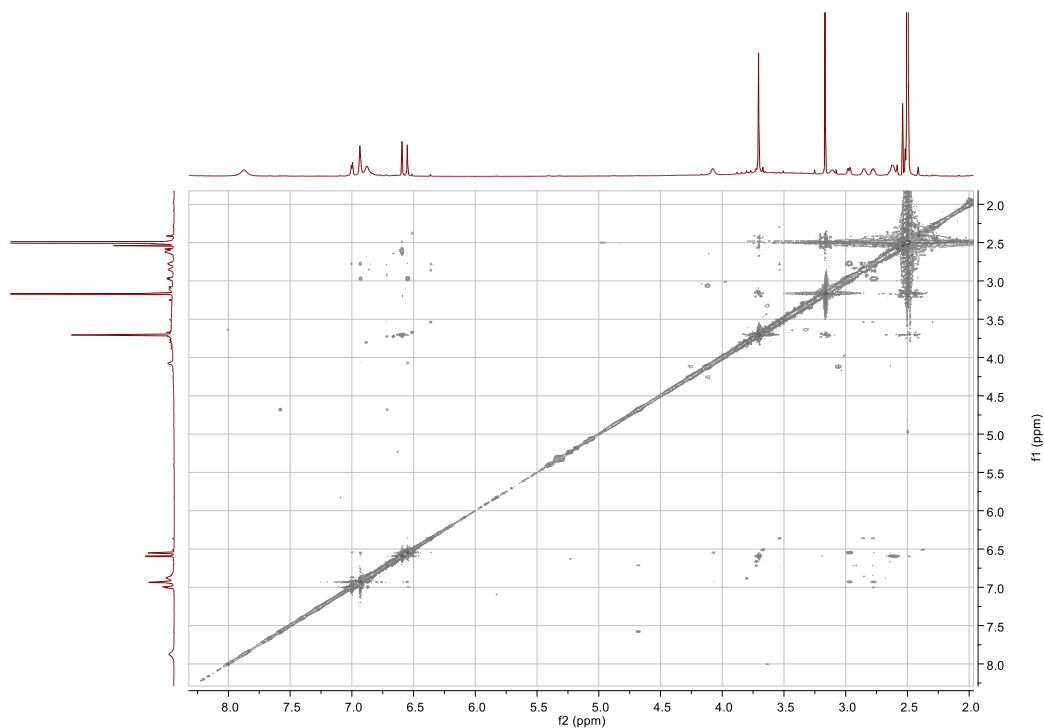

Figure S25. ROESY spectrum (DMSO-*d*<sub>6</sub>, 800 MHz) of compound **4**.

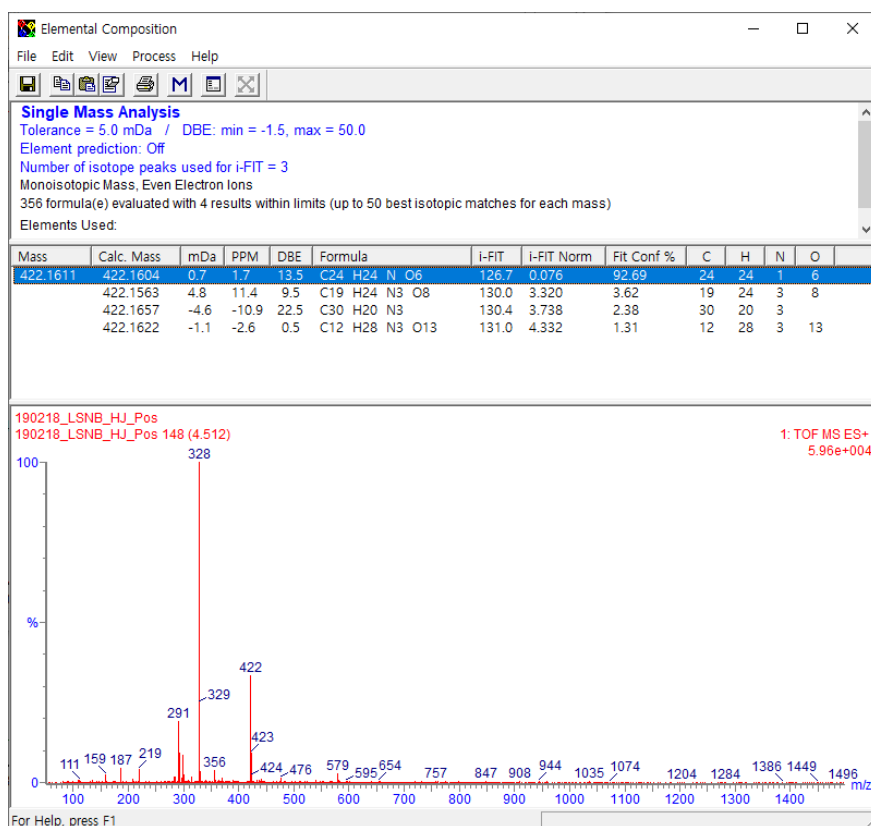

Figure S26. HR-ESI-MS of compound **4**.

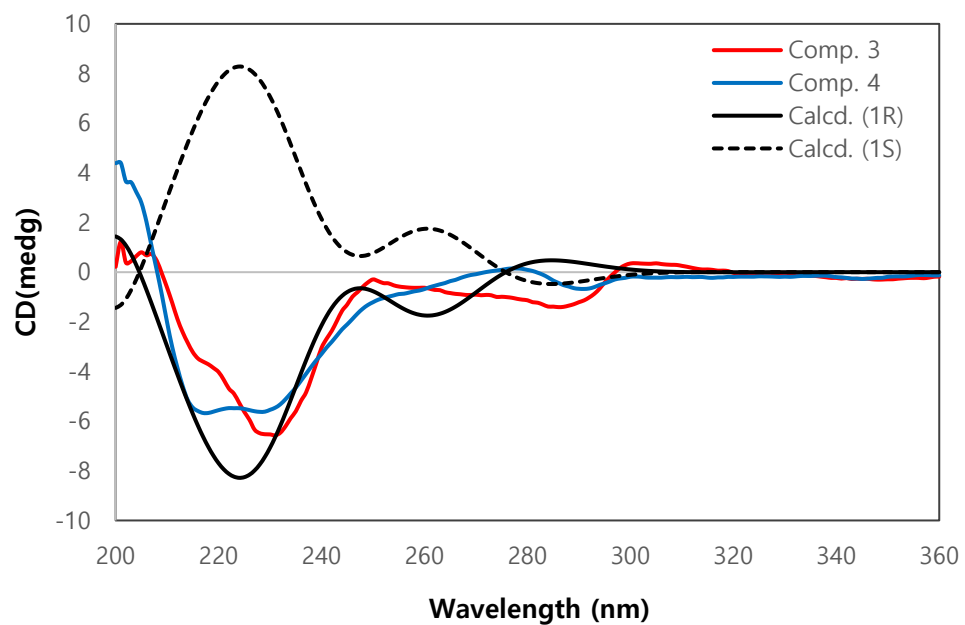

Figure S27. Experimental and calculated CD spectrum of compounds **3** and **4**.

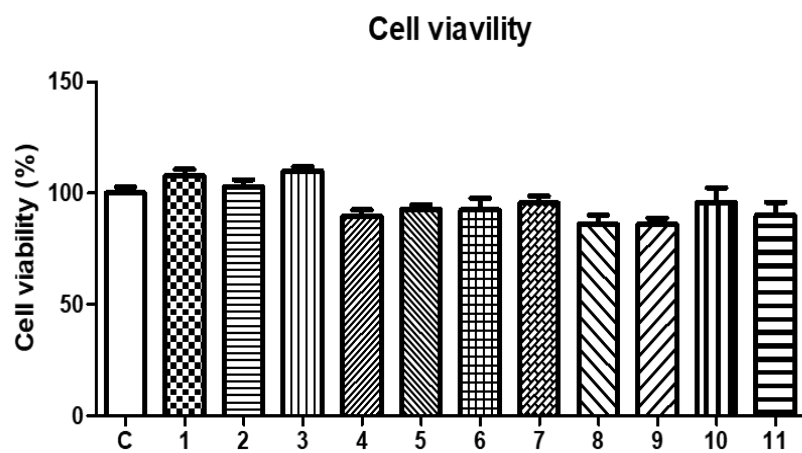

Figure S28. Cytotoxicity of compounds **1–10** on HEK293 cells. The compounds were treated at 20  $\mu$ M for 24 h, the cytotoxicity was calculated compared with control group.



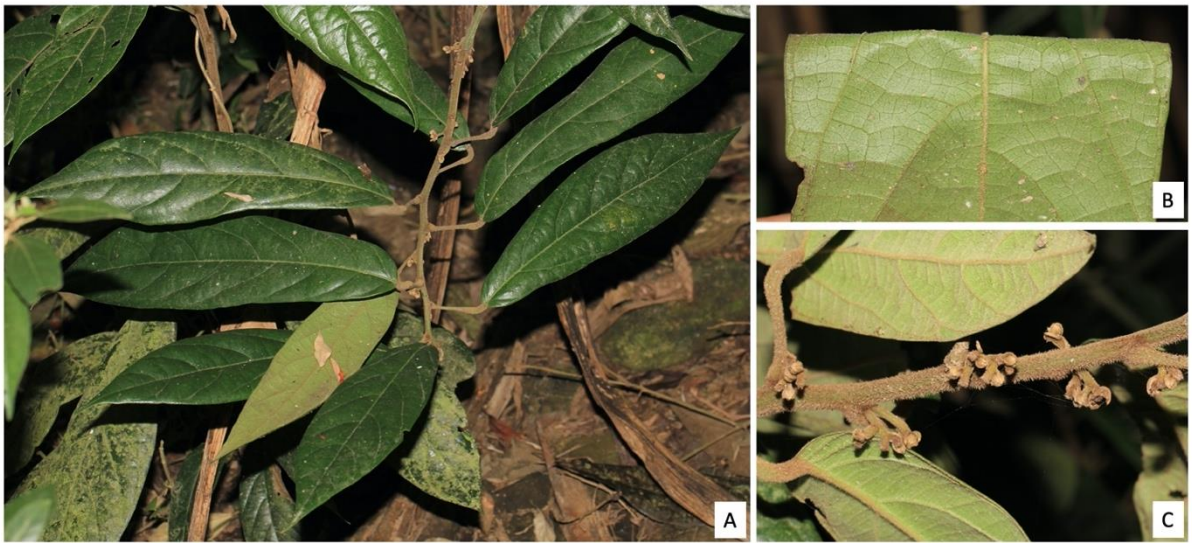

Figure S29. Morphological characteristics of *Limacia scandens* Lour. (A) The whole plant, (B) Abaxial leaf blade, (C) Inflorescences.

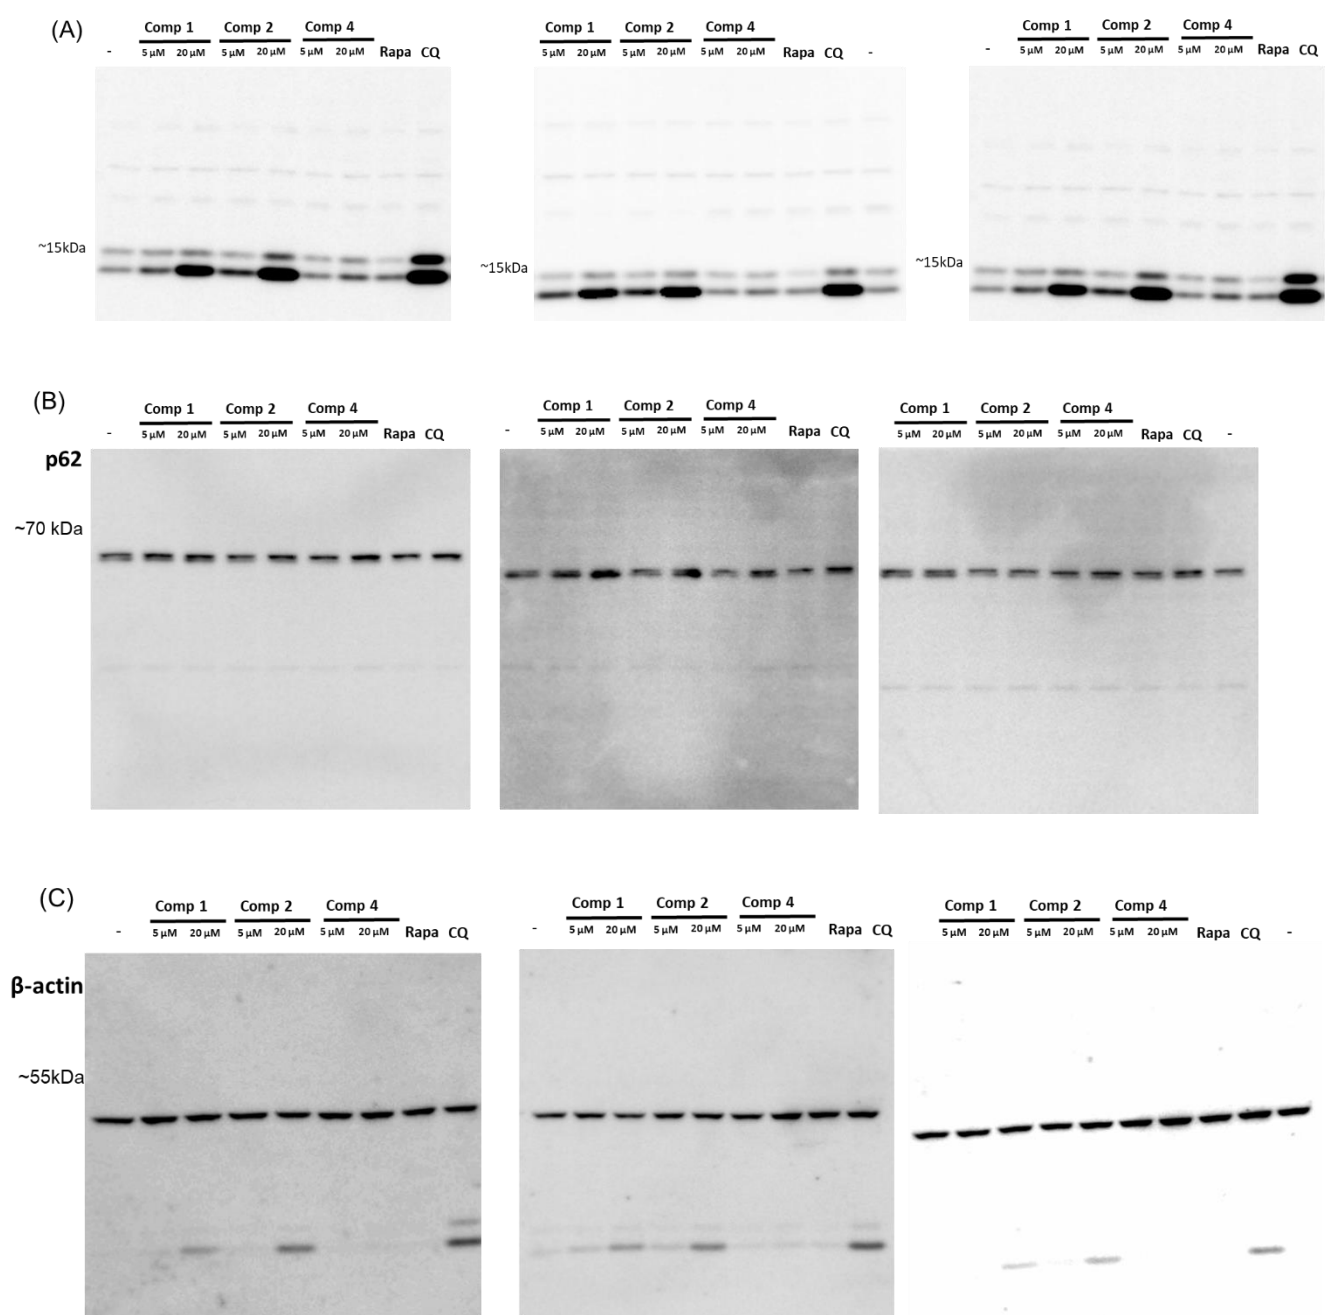

Figure S30. Uncropped western blot images. (A) LC3B level, (B) p62 level, (C)  $\beta$ -actin level.
